# Supplementary material
Source: PubMed Central journal article supplement (PMC2802782)
Supplement: prion0303_0171SD1.pdf [file prion0303_0171SD1.pdf]

## Supplementary methods:

### Bottled water and Midwestern municipal water samples

The following bottled water samples were evaluated: Electrolyte Enhanced deionized water (Whole Foods), Natural Spring Water bottled at Clairvic Spring in Volvic, France (Volvic) and Italian Sparkling Mineral Water, bottled in Silva Lucca, Italy (Whole Foods). Municipal drinking water was collected from Indiana, Michigan and Minnesota.

### PrP<sup>CWD</sup> stoichiometry

We determined the amount of PrP<sup>CWD</sup> in serial dilutions of PK-digested infected brain homogenate by interpolation of PrP<sup>CWD</sup> band intensities from four replicate, unsaturated western blots to a standard curve generated from serial dilutions of rCerPrP samples on the same blots (Figure 2). The PrP<sup>CWD</sup> concentration at each dilution was used to determine the amount of PrP<sup>CWD</sup> detected per microliter of brain homogenate after amplification as follows:

$$Y = X \text{ ng} / 9 \mu\text{l} \times \text{DF} \times 10^{-7}, \text{ where}$$

$$Y = \text{PrP}^{\text{CWD}} \text{ concentration detected}$$

$$X = \text{mean quantity of PrP}^{\text{CWD}} \text{ at given dilution (interpolated from standard curve, } n = \text{four data points per dilution (from four western blots))}$$

$$9 \mu\text{l} = \text{sample volume}$$

$$\text{DF} = \text{PrP}^{\text{CWD}} \text{ dilution factor}$$

$$10^{-7} = \text{sPMCA amplification factor}$$

We calculated an overall mean PrP<sup>CWD</sup> concentration from the means of each dilution to be 100.8 fg/μl of brain homogenate and used that value to calculate the number of PrP<sup>CWD</sup> monomers detected in our sPMCA reactions as follows:

$$Y = 100.8 \text{ fg}/\mu\text{l} \times 25 \mu\text{l} \times [6.022 \times 10^{23} \text{ molecules/mole}] / [30 \times 10^{18} \text{ fg/mole}], \text{ where}$$

Y = number of PrP<sup>CWD</sup> monomers detected in our sPMCA reactions

100.8 fg/ μl = concentration of PrP<sup>CWD</sup>/μl of brain homogenate

25 μl = starting sample volume added to sPMCA reaction

6.022 x 10<sup>23</sup> molecules/mole = Avogadro's number

30 x 10<sup>21</sup> ag/mole = molecular weight of PrP<sup>CWD</sup>

Solving for y yields 5 x 10<sup>7</sup> PrP<sup>CWD</sup> monomers detected in our sPMCA reactions. We determined the PrP<sup>CWD</sup> contamination level in Cache la Poudre river as follows:

$$100.8 \text{ fg}/\mu\text{l} = 100.8 \times 10^{-18} \text{ Kg} / 10^{-6} \text{ L} = 100 \times 10^{-12} \text{ Kg/L} = 100 \text{ parts per trillion}$$

These data are summarized in table S1.

**Table S1. PrP<sup>CWD</sup> stoichiometry**

| <b>fold dilution</b> | <b>mean interpolated</b> | <b>[PrP<sup>CWD</sup>]</b> | <b>PrP<sup>CWD</sup> monomers</b> | <b>pp in HOH</b> |
|----------------------|--------------------------|----------------------------|-----------------------------------|------------------|
| <b>D10</b>           | <b>D10 (ng)</b>          | <b>(fg/μl)</b>             | <b>(x10<sup>7</sup>)</b>          | <b>(ppt)</b>     |
| 100                  | 125                      | 139                        | 6.96                              | 139.29           |
| 200                  | 69.0                     | 153                        | 7.67                              | 153.35           |
| 400                  | 19.9                     | 88.5                       | 4.43                              | 88.51            |
| 800                  | 8.06                     | 71.7                       | 3.58                              | 71.66            |
| 1600                 | 2.88                     | 51.2                       | 2.56                              | 51.21            |
|                      | average                  | 101                        | 5.04                              | 100.80           |
|                      | SD                       | 43.9                       | 2.2                               | 43.88            |

**Table S2.**

| <b>FCWTF Water Production Summary</b>                                     |                 |                 |                |                 |                 |                 |                 |                 |                 |          |
|---------------------------------------------------------------------------|-----------------|-----------------|----------------|-----------------|-----------------|-----------------|-----------------|-----------------|-----------------|----------|
| (Combined Total Influent- Horsetooth Reservoir and Cache La Poudre River) |                 |                 |                |                 |                 |                 |                 |                 |                 |          |
| (Million Gallons)                                                         |                 |                 |                |                 |                 |                 |                 |                 |                 |          |
| Month                                                                     | 1998*           | 1999            | 2000           | 2001            | 2002            | 2003            | 2004            | 2005            | 2006            | 2007     |
| Jan                                                                       | 533.09          | 568.35          | 440.05         | 554.99          | 596.30          | 504.50          | 505.57          | 494.83          | 509.30          | 512.25   |
| Feb                                                                       | 490.23          | 441.28          | 537.83         | 480.65          | 529.51          | 446.21          | 460.54          | 452.86          | 456.98          | 480.61   |
| Mar                                                                       | 537.50          | 535.08          | 608.36         | 572.76          | 593.02          | 503.00          | 526.95          | 495.79          | 496.53          | 518.14   |
| Apr                                                                       | 613.67          | 549.94          | 771.67         | 594.82          | 805.23          | 515.41          | 642.41          | 546.52          | 713.21          | 563.27   |
| May                                                                       | 998.04          | 679.61          | 1,279.01       | 878.54          | 1,036.39        | 708.59          | 868.95          | 753.27          | 1,097.82        | 865.29   |
| Jun                                                                       | 1,204.29        | 1,000.41        | 1,517.04       | 1,457.68        | 1,349.27        | 837.72          | 922.40          | 909.78          | 1,381.35        |          |
| Jul                                                                       | 1,707.97        | 1,514.88        | 1,531.56       | 1,618.55        | 1,400.62        | 1,259.92        | 1,030.01        | 1,383.93        | 1,210.29        |          |
| Aug                                                                       | 1,333.38        | 1,144.84        | 1,331.49       | 1,357.98        | 1,143.62        | 1,232.85        | 905.57          | 1,142.82        | 1,151.16        |          |
| Sep                                                                       | 1,205.99        | 918.78          | 962.57         | 1,080.62        | 924.86          | 895.93          | 782.28          | 1,086.04        | 903.36          |          |
| Oct                                                                       | 715.09          | 739.81          | 690.03         | 818.29          | 619.80          | 752.91          | 557.45          | 514.82          | 645.41          |          |
| Nov                                                                       | 495.29          | 568.37          | 528.58         | 618.05          | 517.96          | 493.47          | 422.70          | 402.06          | 427.97          |          |
| Dec                                                                       | 523.64          | 551.85          | 547.81         | 574.20          | 517.41          | 488.14          | 481.90          | 516.85          | 460.76          |          |
| TOTAL                                                                     | 10,358.18       | 9,213.20        | 10,746.00      | 10,607.13       | 10,033.99       | 8,638.65        | 8,106.73        | 8,699.57        | 9,454.14        | 2,939.56 |
| Treated Water Cost<br>(per 1,000 gallons)                                 | 0.22            | 0.24            | 0.23           | 0.25            | 0.28            | 0.31            | 0.34            | 0.33            | 0.33            | 0.33     |
| Highest<br>Daily<br>Production                                            | Jul 18<br>72.14 | Jul 11<br>58.56 | Jun 8<br>66.10 | Jun 30<br>68.03 | Jun 28<br>63.53 | Aug 14<br>53.32 | Jul 13<br>46.38 | Jul 13<br>58.16 | Jun 14<br>61.90 | Jun 14   |

1998 = Total Combined Influent plus Washwater Return and SWR.

**Table S3. Fort Collins Water Treatment Facility Treated Water by Water Source**

| Month | Cache La Poudre River |        |        |        |         | Horsetooth Reservoir |        |        |        |         |
|-------|-----------------------|--------|--------|--------|---------|----------------------|--------|--------|--------|---------|
|       | 2003                  | 2004   | 2005   | 2006   | 2007    | 2003                 | 2004   | 2005   | 2006   | 2007    |
| Jan   | 63.20%                | 65.52% | 68.77% | 58.26% | 50.49%  | 36.80%               | 34.48% | 31.23% | 41.74% | 49.51%  |
| Feb   | 48.66%                | 70.31% | 70.21% | 61.24% | 49.00%  | 51.34%               | 29.69% | 29.79% | 38.76% | 51.00%  |
| Mar   | 58.11%                | 75.11% | 71.46% | 62.42% | 50.25%  | 41.89%               | 24.89% | 28.54% | 37.58% | 49.75%  |
| Apr   | 69.38%                | 66.67% | 60.16% | 43.47% | 45.13%  | 30.62%               | 33.33% | 39.84% | 56.53% | 54.87%  |
| May   | 70.16%                | 70.88% | 85.31% | 46.60% | 41.83%  | 29.84%               | 29.12% | 14.69% | 53.40% | 58.17%  |
| Jun   | 56.79%                | 74.67% | 89.42% | 51.52% | #DIV/0! | 43.21%               | 25.33% | 10.58% | 48.48% | #DIV/0! |
| Jul   | 49.05%                | 66.33% | 60.37% | 55.65% | #DIV/0! | 50.95%               | 33.67% | 39.63% | 44.35% | #DIV/0! |
| Aug   | 50.71%                | 73.20% | 69.90% | 46.97% | #DIV/0! | 49.29%               | 26.80% | 30.10% | 53.03% | #DIV/0! |
| Sep   | 29.56%                | 79.46% | 68.24% | 58.81% | #DIV/0! | 70.44%               | 20.54% | 31.76% | 41.19% | #DIV/0! |
| Oct   | 48.58%                | 60.55% | 51.64% | 70.17% | #DIV/0! | 51.42%               | 39.45% | 48.36% | 29.83% | #DIV/0! |
| Nov   | 73.31%                | 75.02% | 37.46% | 67.80% | #DIV/0! | 26.69%               | 24.98% | 62.54% | 32.20% | #DIV/0! |
| Dec   | 71.20%                | 72.37% | 53.42% | 57.08% | #DIV/0! | 28.80%               | 27.63% | 46.58% | 42.92% | #DIV/0! |
| Total | 54.89%                | 70.99% | 67.42% | 54.70% | 46.63%  | 45.11%               | 29.01% | 32.58% | 45.30% | 53.37%  |

Table S4.

## 2007 City of Fort Collins Drinking Drinking Water Quality Summary

4-Feb-08

| Parameter                                    | MCL       | Poudre River | Horseshoeth Reservoir | SS#2 (HSPS) | WFCWD Office | Service Center | Poudre Valley Hospital | Drake Terrace | PRPA Bldg |
|----------------------------------------------|-----------|--------------|-----------------------|-------------|--------------|----------------|------------------------|---------------|-----------|
| Free Chlorine Residual                       | 4         | -            | -                     | 0.7         | 0.4          | 0.4            | 0.5                    | 0.6           | 0.4       |
| Temperature                                  | -         | 8.2          | 7.9                   | 8.1         | 15.9         | 14.8           | 13.5                   | 10.7          | 14.1      |
| QuantiTray®, Total Coliform / 100ml          | <1        | 377          | 920                   | <1          | <1           | <1             | <1                     | <1            | <1        |
| QuantiTray®, E. Coli / 100ml                 | <1        | 16           | 0                     | <1          | <1           | <1             | <1                     | <1            | <1        |
| Fecal Strep / 100ml                          | -         | 42           | 3                     | <1          | -            | -              | -                      | -             | -         |
| Heterotrophic Plate Count / 1.0 ml           | -         | 193          | 69                    | <1          | 9            | <1             | <1                     | 1             | 1         |
| Spore Formers / 100ml                        | -         | 142          | 96                    | <1          | -            | -              | -                      | -             | -         |
| Alkalinity as CaCO <sub>3</sub> , mg/L       | -         | 22.6         | 28.9                  | 37.2        | 37.7         | 37.6           | 37.6                   | 37.3          | 37.9      |
| Aluminum, Reactive, µg/L                     | -         | <15.0        | <15.0                 | 27.9        | 20.1         | 26.2           | 19.4                   | 26.9          | 22.5      |
| Ammonia as N, mg/L                           | -         | <0.02        | <0.02                 | <0.02       | -            | -              | -                      | -             | -         |
| Calcium as CaCO <sub>3</sub> , mg/L          | -         | 16.4         | 23.3                  | 43.1        | 44.2         | 43.8           | 44.0                   | 43.1          | 41.4      |
| Color, APHA Pt/Co units                      | 15        | 17.5         | 11.9                  | <2.5        | <2.5         | <2.5           | <2.5                   | <2.5          | <2.5      |
| Chlorophyll a, mg/L                          | -         | 1.4          | 1.4                   | -           | -            | -              | -                      | -             | -         |
| Hardness as CaCO <sub>3</sub> , mg/L         | -         | 24.7         | 30.5                  | 49.2        | 49.2         | 49.1           | 48.7                   | 48.0          | 47.3      |
| Hardness, Lachat as CaCO <sub>3</sub> , mg/L | -         | 22.9         | 30.8                  | 51.1        | 52.0         | 51.6           | 51.6                   | 50.9          | 48.0      |
| Chlorate, mg/L                               | -         | -            | -                     | <0.1        | <0.1         | <0.1           | <0.1                   | <0.1          | <0.1      |
| Chloride, mg/L                               | (250)     | 1.8          | 1.3                   | 2.6         | -            | -              | -                      | -             | -         |
| Chlorite, mg/L                               | 1         | -            | -                     | 0.13        | 0.12         | 0.13           | 0.12                   | 0.13          | 0.16      |
| Fluoride, mg/L                               | 4         | 0.1          | 0.1                   | 0.8         | 0.8          | 0.8            | 0.8                    | 0.8           | 0.7       |
| Nitrate, mg/L                                | 10        | 0.05         | 0.09                  | 0.07        | -            | -              | -                      | -             | -         |
| Nitrite, mg/L                                | 1         | <0.04        | <0.04                 | <0.04       | -            | -              | -                      | -             | -         |
| Sulfate, mg/L                                | (250)     | 3.5          | 3.9                   | 12.7        | -            | -              | -                      | -             | -         |
| Langlier Larson Saturation Index             | -         | -2.3         | -2.1                  | -1.4        | -1.3         | -1.3           | -1.3                   | -1.4          | -1.2      |
| ortho-Phosphate, mg/L                        | -         | <0.005       | 0.005                 | <0.005      | -            | -              | -                      | -             | -         |
| pH, pH units                                 | 6.5 - 8.5 | 7.6          | 7.5                   | 7.8         | 7.9          | 7.9            | 7.8                    | 7.8           | 8.0       |
| Silica, mg/L                                 | -         | 7.9          | 3.2                   | 6.3         | -            | -              | -                      | -             | -         |
| Specific Conductance, µmhos/cm               | -         | 61           | 73                    | 119         | 121          | 120            | 120                    | 119           | 117       |
| Total Dissolved Solids, mg/L                 | (500)     | 48           | 50                    | 74          | 72           | 72             | 74                     | 73            | 70        |
| Total Kjeldahl Nitrogen as N, mg/L           | -         | 0.22         | 0.24                  | -           | -            | -              | -                      | -             | -         |
| Total Phosphorus, mg/L                       | -         | 0.01         | 0.01                  | <0.01       | -            | -              | -                      | -             | -         |
| Turbidity, NTU                               | 1         | 2.57         | 3.33                  | 0.14        | 0.13         | 0.14           | 0.16                   | 0.14          | 0.15      |
| Aluminum, µg/L                               | (50-200)  | 241          | 350                   | 68          | 67           | 61             | 64                     | 70            | 74        |
| Antimony, µg/L                               | 6         | <2.0         | <2.0                  | <2.0        | <2.0         | <2.0           | <2.0                   | <2.0          | <2.0      |
| Arsenic, µg/L                                | 10        | <2.0         | <2.0                  | <2.0        | <2.0         | <2.0           | <2.0                   | <2.0          | <2.0      |
| Barium, µg/L                                 | 2000      | 15           | 19                    | 17          | 18           | 18             | 18                     | 18            | 19        |
| Beryllium, µg/L                              | 4         | <0.2         | <0.2                  | <0.2        | <0.2         | <0.2           | <0.2                   | <0.2          | <0.2      |
| Cadmium, µg/L                                | 5         | <0.1         | <0.1                  | <0.1        | <0.1         | <0.1           | <0.1                   | <0.1          | <0.1      |
| Chromium, µg/L                               | 100       | <0.5         | <0.5                  | <0.5        | 0.5          | <0.5           | <0.5                   | <0.5          | <0.5      |
| Copper, µg/L                                 | [1300]    | <3.0         | 4.3                   | <3.0        | 34.6         | 15.0           | 52.4                   | 12.8          | 27.8      |
| Iron, µg/L                                   | (300)     | 401          | 139                   | 16          | 19           | 20             | 16                     | 16            | 19        |
| Lead, µg/L                                   | [15]      | <1.0         | <1.0                  | <1.0        | <1.0         | <1.0           | <1.0                   | <1.0          | <1.0      |
| Manganese, µg/L                              | (50)      | 12.1         | 26.0                  | 1.4         | <1.0         | 1.2            | 1.4                    | 1.4           | 1.4       |
| Mercury, µg/L                                | 2         | <0.2         | <0.2                  | <0.2        | <0.2         | <0.2           | <0.2                   | <0.2          | <0.2      |
| Molybdenum, µg/L                             | -         | <2.0         | <2.0                  | <2.0        | <2.0         | <2.0           | <2.0                   | <2.0          | <2.0      |
| Nickel, µg/L                                 | -         | <2.0         | <2.0                  | <2.0        | <2.0         | <2.0           | <2.0                   | <2.0          | <2.0      |
| Selenium, µg/L                               | 50        | <1.0         | <1.0                  | <1.0        | <1.0         | <1.0           | <1.0                   | <1.0          | <1.0      |
| Silver, µg/L                                 | (100)     | <0.5         | <0.5                  | <0.5        | <0.5         | <0.5           | <0.5                   | <0.5          | <0.5      |
| Thallium, µg/L                               | 2         | <1.0         | <1.0                  | <1.0        | <1.0         | <1.0           | <1.0                   | <1.0          | <1.0      |
| Calcium, mg/L                                | -         | 6.0          | 8.7                   | 14.6        | 14.0         | -              | -                      | -             | -         |
| Magnesium, mg/L                              | -         | 1.6          | 1.6                   | 1.6         | 1.8          | -              | -                      | -             | -         |
| Potassium, mg/L                              | -         | 0.8          | 0.8                   | 0.8         | 0.8          | -              | -                      | -             | -         |
| Sodium, mg/L                                 | (20)      | 2.8          | 2.6                   | 2.8         | 2.7          | 2.8            | 2.9                    | 2.9           | 4.4       |
| Zinc, mg/L                                   | (5)       | <0.05        | <0.05                 | <0.05       | <0.05        | <0.05          | <0.05                  | <0.05         | <0.05     |
| Total Organic Carbon, mg/L                   | -         | 3.6          | 3.2                   | 1.6         | 1.6          | 1.6            | 1.6                    | 1.6           | 1.8       |
| Total Trihalomethane, µg/L                   | 80        | <0.4         | <0.4                  | 19          | 32           | 33             | 30                     | 26            | 32        |

**Notes :**  
 mg/L = milligram per liter or part per million  
 µg/L = micrograms per liter or part per billion  
 Poudre River = Cache la Poudre River Raw Water at Plant  
 Horseshoeth Res = Horseshoeth Reservoir Raw Water at Plant  
 MCL = Maximum Contaminant Level  
 ( ) = Secondary level (esthetic)  
 [ ] = 90th 5tile action level      < = Less Than

WFCWD Office, 2711 Overland Trail  
 SS #2 = Sample Station 2, Official Dist. System Entry Point  
 WFCWD Office, 2711 Overland Trail  
 Service Center, 700 Wood Street  
 Poudre Valley Hospital, 1024 Lemay Avenue  
 Drake Terrace, 343 W. Drake Rd.  
 PRPA = Platte River Power Authority Office

**Table S5. HT water quality data for May 2007.**

**WTF Laboratory - Daily Averages Year : '2007'**

**Month: May Sample Name: Horsetooth Water [HT]**

| Date           | Results (Daily Averages) |              |                       |                            | Flow<br>MGD | Fluoride<br>MG/L | Hardness<br>MG/L CaCO3 | pH<br>PH UNITS | Temp.<br>C | Total Organic Carbon<br>MG/L | Turbidity<br>NTU |
|----------------|--------------------------|--------------|-----------------------|----------------------------|-------------|------------------|------------------------|----------------|------------|------------------------------|------------------|
|                | Alkalinity<br>MG/L CaCO3 | Color<br>SCU | Conductivity<br>US/CM | Oxygen (Dissolved)<br>MG/L |             |                  |                        |                |            |                              |                  |
| 05/01/2007     | 33.100                   | 10.010       |                       |                            | 9.160       |                  |                        | 7.430          |            | 2.980                        | 1.910            |
| 05/02/2007     | 33.300                   | 10.400       |                       |                            | 12.820      |                  |                        | 7.480          |            | 2.940                        | 1.800            |
| 05/03/2007     | 33.200                   | 9.260        |                       |                            | 18.760      |                  |                        | 7.410          |            | 3.040                        | 2.100            |
| 05/04/2007     | 30.800                   | 10.000       |                       |                            | 25.100      |                  |                        | 7.680          | 6.900      | 2.740                        | 1.860            |
| 05/05/2007     | 29.900                   | 9.700        |                       |                            | 12.870      |                  |                        | 7.620          |            | 2.940                        | 1.880            |
| 05/06/2007     | 29.300                   | 6.590        |                       |                            | 10.930      |                  |                        | 7.420          |            | 3.120                        | 1.940            |
| 05/07/2007     | 30.100                   | 8.960        | 75.700                |                            | 12.930      | 0.170            | 30.800                 | 7.590          | 6.900      | 3.140                        | 1.900            |
| 05/08/2007     | 32.200                   | 10.800       |                       |                            | 15.430      |                  |                        | 7.460          |            | 3.160                        | 1.900            |
| 05/09/2007     | 32.500                   | 10.300       |                       |                            | 14.810      |                  |                        | 7.410          |            | 3.090                        | 1.900            |
| 05/10/2007     | 33.700                   | 10.000       |                       |                            | 13.310      |                  |                        | 7.410          |            | 3.060                        | 1.810            |
| 05/11/2007     | 30.100                   | 10.300       |                       |                            |             |                  |                        | 7.620          | 7.420      | 2.950                        | 1.800            |
| 05/12/2007     | 29.800                   | 10.810       |                       |                            |             |                  |                        | 7.400          | 7.200      | 2.820                        | 1.820            |
| 05/13/2007     | 30.300                   | 10.230       |                       |                            | 21.000      |                  |                        | 7.530          | 7.100      | 3.000                        | 2.100            |
| 05/14/2007     | 31.100                   | 9.330        | 71.000                |                            | 19.990      | 0.170            |                        | 7.450          | 7.100      |                              | 2.000            |
| 05/15/2007     | 30.000                   | 10.300       |                       |                            |             |                  |                        | 7.610          | 7.000      | 2.780                        | 1.850            |
| 05/16/2007     | 30.200                   | 9.860        |                       |                            | 7.430       |                  |                        | 7.470          |            | 2.860                        | 2.100            |
| 05/17/2007     | 29.600                   | 10.380       |                       |                            | 21.080      |                  |                        | 7.550          |            | 2.910                        | 2.200            |
| 05/18/2007     | 29.300                   | 10.200       |                       |                            |             |                  |                        | 7.570          | 7.200      | 2.720                        | 2.200            |
| 05/19/2007     | 30.400                   | 10.560       |                       |                            | 40.000      |                  |                        | 7.590          | 7.300      | 2.940                        | 2.200            |
| 05/20/2007     | 30.600                   | 10.810       |                       |                            | 19.000      |                  |                        | 7.670          | 7.400      | 2.830                        | 2.300            |
| 05/21/2007     | 30.300                   | 10.800       | 77.500                | 8.800                      | 23.810      | 0.180            | 26.200                 | 7.560          | 7.200      | 2.870                        | 2.200            |
| 05/22/2007     | 33.800                   | 11.300       |                       |                            | 19.960      |                  |                        | 7.500          |            | 3.040                        | 2.200            |
| 05/23/2007     | 33.000                   | 11.730       |                       |                            | 11.320      |                  |                        | 7.420          |            | 2.960                        | 2.400            |
| 05/24/2007     | 33.200                   | 11.400       |                       |                            | 11.320      |                  |                        | 7.380          |            | 3.170                        | 2.300            |
| 05/25/2007     | 30.300                   | 11.200       |                       |                            |             |                  |                        | 7.640          | 7.400      | 2.620                        | 2.400            |
| 05/26/2007     | 29.900                   | 10.160       |                       |                            |             |                  |                        | 7.560          | 7.500      | 2.780                        | 2.300            |
| 05/27/2007     | 30.200                   | 12.610       |                       |                            |             |                  |                        | 7.420          | 7.500      | 2.920                        | 2.400            |
| 05/28/2007     | 30.200                   | 8.360        |                       |                            | 20.000      |                  |                        | 7.750          |            | 2.980                        | 2.500            |
| 05/29/2007     | 31.400                   | 12.100       | 75.700                |                            | 19.960      | 0.160            | 28.200                 | 7.450          | 7.600      | 3.010                        | 2.400            |
| 05/30/2007     | 33.400                   | 12.300       |                       |                            | 8.320       |                  |                        | 7.410          |            | 2.990                        | 2.500            |
| 05/31/2007     | 33.600                   | 11.800       |                       |                            | 8.320       |                  |                        | 7.400          |            | 3.120                        | 2.500            |
| <b>Average</b> | 31.252                   | 10.405       | 74.975                | 8.800                      | 16.568      | 0.170            | 28.400                 | 7.512          | 7.248      | 2.949                        | 2.118            |
| <b>Minimum</b> | 29.300                   | 6.590        | 71.000                | 8.800                      | 7.430       | 0.160            | 26.200                 | 7.380          | 6.900      | 2.620                        | 1.800            |
| <b>Maximum</b> | 33.800                   | 12.610       | 77.500                | 8.800                      | 40.000      | 0.180            | 30.800                 | 7.750          | 7.600      | 3.170                        | 2.500            |

Select Month and Sample Name from page items. Averages, Minimums and Maximums are at the bottom.

**Table S6. PR water quality data for May 2007.**

**WTF Laboratory - Daily Averages Year : '2007'**

**Month:May      Sample Name:PRW [Poudre River Water]**

| Results (Daily Averages) |            |        |              |                    |        |          |            |          |             |                     |           |
|--------------------------|------------|--------|--------------|--------------------|--------|----------|------------|----------|-------------|---------------------|-----------|
| Date                     | Alkalinity | Color  | Conductivity | Oxygen (Dissolved) | Flow   | Fluoride | Hardness   | pH       | Temperature | Total OrganicCarbon | Turbidity |
|                          | MG/L CaCO3 | SCU    | US/CM        | MG/L               | MGD    | MG/L     | MG/L CaCO3 | PH UNITS | C           | MG/L                | NTU       |
| 05/01/2007               | 26.900     | 30.400 |              |                    | 8.500  |          |            | 7.420    |             | 6.600               | 7.100     |
| 05/02/2007               | 23.800     | 40.600 |              |                    | 10.500 |          |            | 7.420    |             | 7.940               | 7.300     |
| 05/03/2007               | 22.700     | 47.010 |              |                    | 8.500  |          |            | 7.400    |             | 9.090               | 7.500     |
| 05/04/2007               | 19.300     | 52.700 |              |                    | 25.300 |          |            | 7.520    | 11.600      | 10.100              | 7.000     |
| 05/05/2007               | 17.300     | 48.600 |              |                    | 8.500  |          |            | 7.510    |             | 9.750               | 5.500     |
| 05/06/2007               | 19.200     | 46.300 |              |                    | 8.500  |          |            | 7.490    |             | 8.950               | 4.400     |
| 05/07/2007               | 19.400     | 47.110 | 60.100       |                    | 6.500  | 0.150    | 19.600     | 7.610    | 7.800       | 8.640               | 10.400    |
| 05/08/2007               | 19.800     | 44.600 |              |                    | 4.000  |          |            | 7.550    |             | 8.470               | 3.100     |
| 05/09/2007               | 20.300     | 37.800 |              |                    | 8.500  |          |            | 7.540    |             | 7.840               | 3.500     |
| 05/10/2007               | 24.300     | 35.110 |              |                    | 10.000 |          |            | 7.510    |             | 7.540               | 10.500    |
| 05/11/2007               | 21.400     | 37.800 |              |                    |        |          |            | 7.610    | 11.300      | 7.940               | 4.400     |
| 05/12/2007               | 21.000     | 40.310 |              |                    |        |          |            | 7.620    | 12.100      | 7.470               | 3.800     |
| 05/13/2007               | 17.200     | 56.230 |              |                    | 15.000 |          |            | 7.460    | 10.600      | 9.060               | 12.600    |
| 05/14/2007               | 17.600     | 51.900 | 40.200       |                    | 15.000 | 0.130    |            | 7.460    | 9.500       | 9.150               | 23.200    |
| 05/15/2007               | 15.400     | 54.500 |              |                    |        |          |            | 7.290    | 8.300       | 8.710               | 9.400     |
| 05/16/2007               | 14.900     | 56.660 |              |                    | 12.000 |          |            | 7.350    |             | 9.360               | 7.500     |
| 05/17/2007               | 15.100     | 56.400 |              |                    | 10.000 |          |            | 7.320    |             | 8.790               | 6.000     |
| 05/18/2007               | 14.700     | 55.700 |              |                    |        |          |            | 7.360    | 8.600       | 8.520               | 4.000     |
| 05/19/2007               | 14.600     | 50.160 |              |                    | 15.000 |          |            | 7.350    | 9.200       | 9.310               | 6.200     |
| 05/20/2007               | 13.500     | 50.250 |              |                    | 15.000 |          |            | 7.340    | 8.500       | 10.000              | 5.200     |
| 05/21/2007               | 17.200     | 45.270 | 39.600       | 8.500              | 15.000 | 0.130    | 13.000     | 7.360    | 8.800       | 8.220               | 8.250     |
| 05/22/2007               | 16.700     | 47.870 |              |                    | 15.000 |          |            | 7.400    |             | 9.500               | 12.600    |
| 05/23/2007               | 18.100     | 46.100 |              |                    | 12.000 |          |            | 7.380    |             | 8.320               | 4.800     |
| 05/24/2007               | 16.800     | 42.200 |              |                    | 12.000 |          |            | 7.350    |             | 8.200               | 4.200     |
| 05/25/2007               | 16.800     | 41.050 |              |                    |        |          |            | 7.490    | 7.800       | 6.280               | 3.500     |
| 05/26/2007               | 16.300     | 41.820 |              |                    | 15.000 |          |            | 7.420    | 9.500       | 6.760               | 2.400     |
| 05/27/2007               | 16.000     | 37.750 |              |                    |        |          |            | 7.400    | 9.300       | 7.050               | 2.500     |
| 05/28/2007               | 13.200     | 47.000 |              |                    | 15.000 |          |            | 7.500    |             | 7.740               | 4.700     |
| 05/29/2007               | 14.800     | 43.600 | 40.000       |                    | 15.000 | 0.170    | 13.000     | 7.240    | 10.700      | 7.740               | 5.390     |
| 05/30/2007               | 16.300     | 41.300 |              |                    | 15.000 |          |            | 7.330    |             | 7.450               | 4.100     |
| 05/31/2007               | 17.500     | 39.500 |              |                    | 15.000 |          |            | 7.330    |             | 7.250               | 3.000     |
| <b>Average</b>           | 18.003     | 45.600 | 44.975       | 8.500              | 12.392 | 0.145    | 15.200     | 7.430    | 9.573       | 8.265               | 5.610     |
| <b>Minimum</b>           | 13.200     | 30.400 | 39.600       | 8.500              | 4.000  | 0.130    | 13.000     | 7.240    | 7.800       | 6.280               | 2.400     |
| <b>Maximum</b>           | 26.900     | 56.660 | 60.100       | 8.500              | 25.300 | 0.170    | 19.600     | 7.620    | 12.100      | 10.100              | 12.800    |

ms. Averages, Minimums and Maximums are at the bottom.



**Table S7. TOC levels in negative control water samples**

| SAMPLE<br>IDENTIFICATION     | TOC RESULTS<br>(mg/L)     |      |      |
|------------------------------|---------------------------|------|------|
|                              | MI SETTLED #1 & # 2 & # 3 | 7.69 | 7.46 |
| LAKE MI #4 & # 6 & # 7       | 0.38                      | 0.34 | 0.34 |
| MI STIRRED # 8 & # 9 & # 10  | 7.46                      | 6.31 | 6.15 |
| IL GROUND # 11 & # 12 & # 13 | 2.11                      | 2.41 | 2.26 |
| IL SURFACE #14 & # 15 & # 16 | 4.90                      | 5.10 | 4.49 |

**Table S8. 2007 infected cervid estimates in Cache la Poudre watershed**

| DAU | LOWER |     |              | DAU total   | UPPER |     |              | DAU total   |
|-----|-------|-----|--------------|-------------|-------|-----|--------------|-------------|
|     | deer  | elk | moose        |             | deer  | elk | moose        |             |
| E4  |       | 370 | 295          | 665         | 613   | 126 | 10           | 749         |
| E9  |       | 392 | 31           | 423         | 617   | 99  | 0            | 716         |
|     |       |     | <b>total</b> | <b>1087</b> |       |     | <b>total</b> | <b>1465</b> |

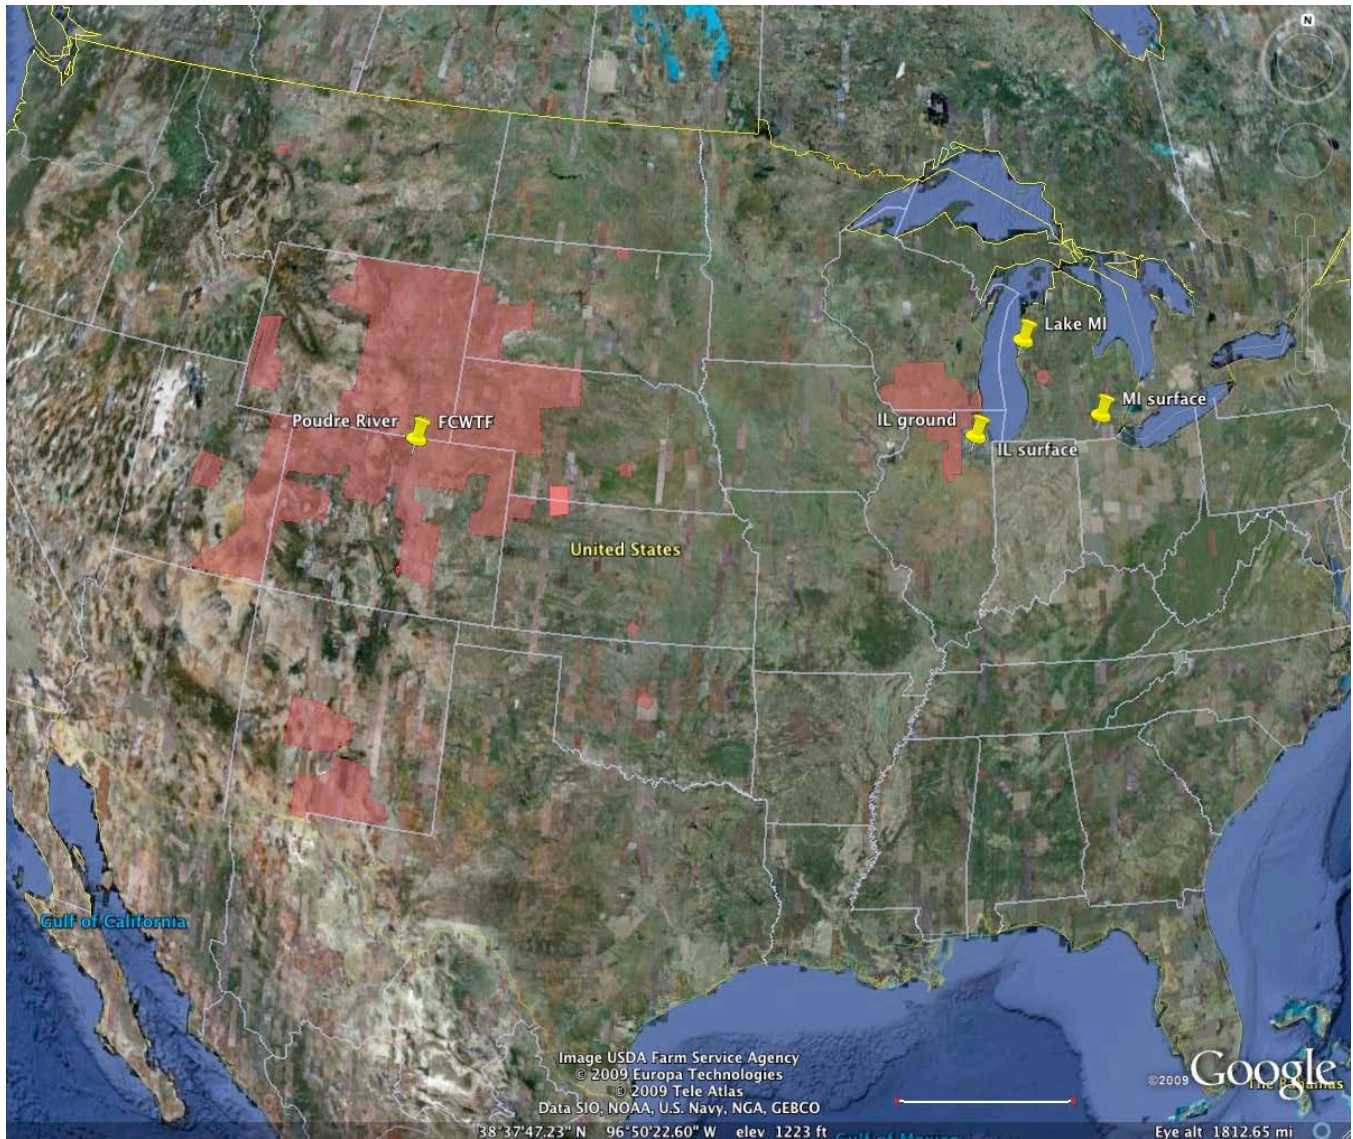

**Figure S1. Map of water collection points<sup>1</sup>.** Areas where cervids have tested positive for CWD are shown in red. Yellow pins mark water collection points. Scale bar, 400 km.

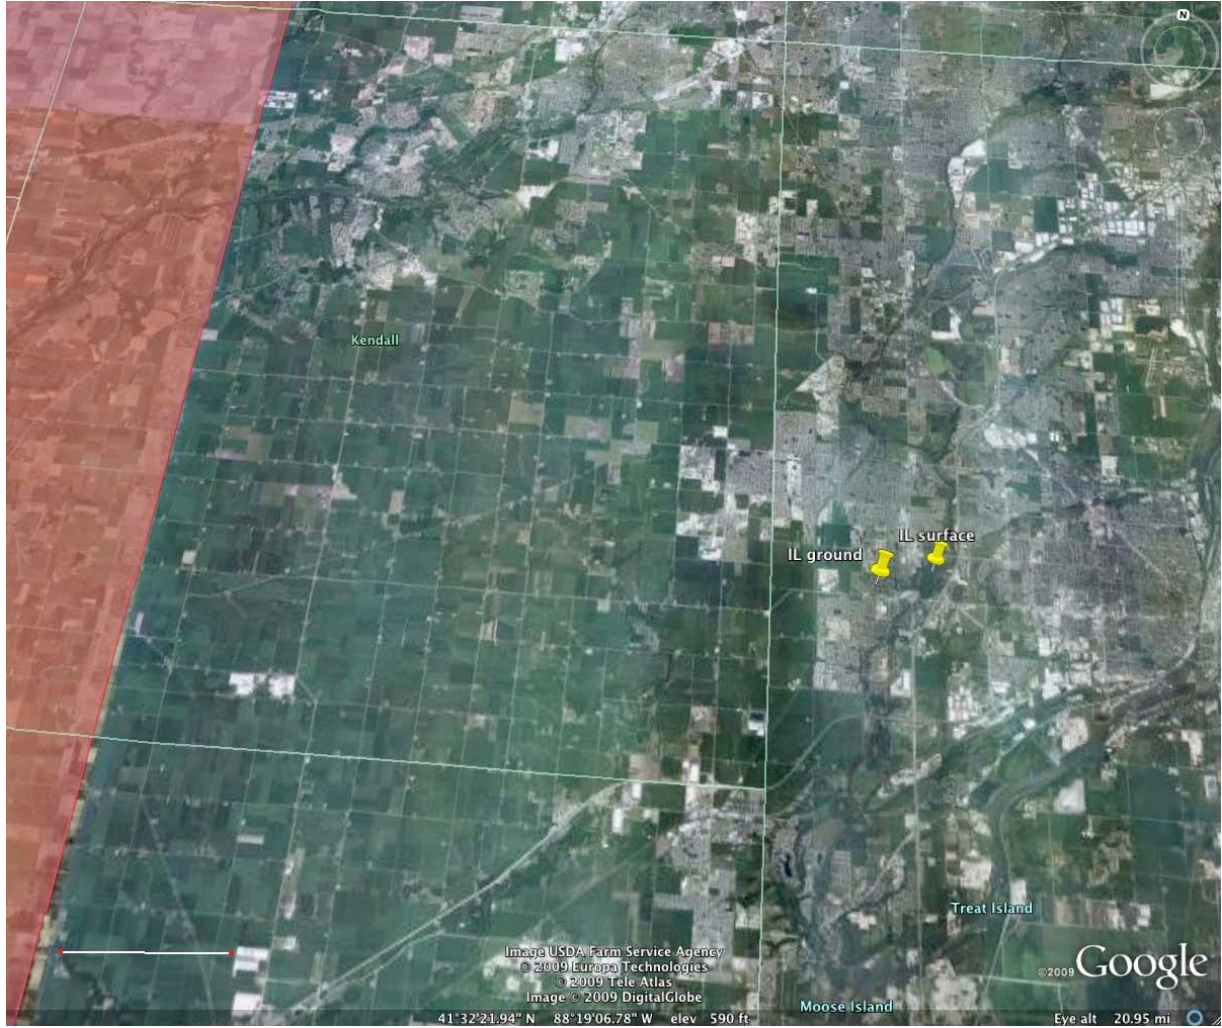

**Figure S2. Map showing IL water collection points<sup>1</sup>.** The red area indicates the boundary where CWD infected animals have been found. Scale bar, 1 km.

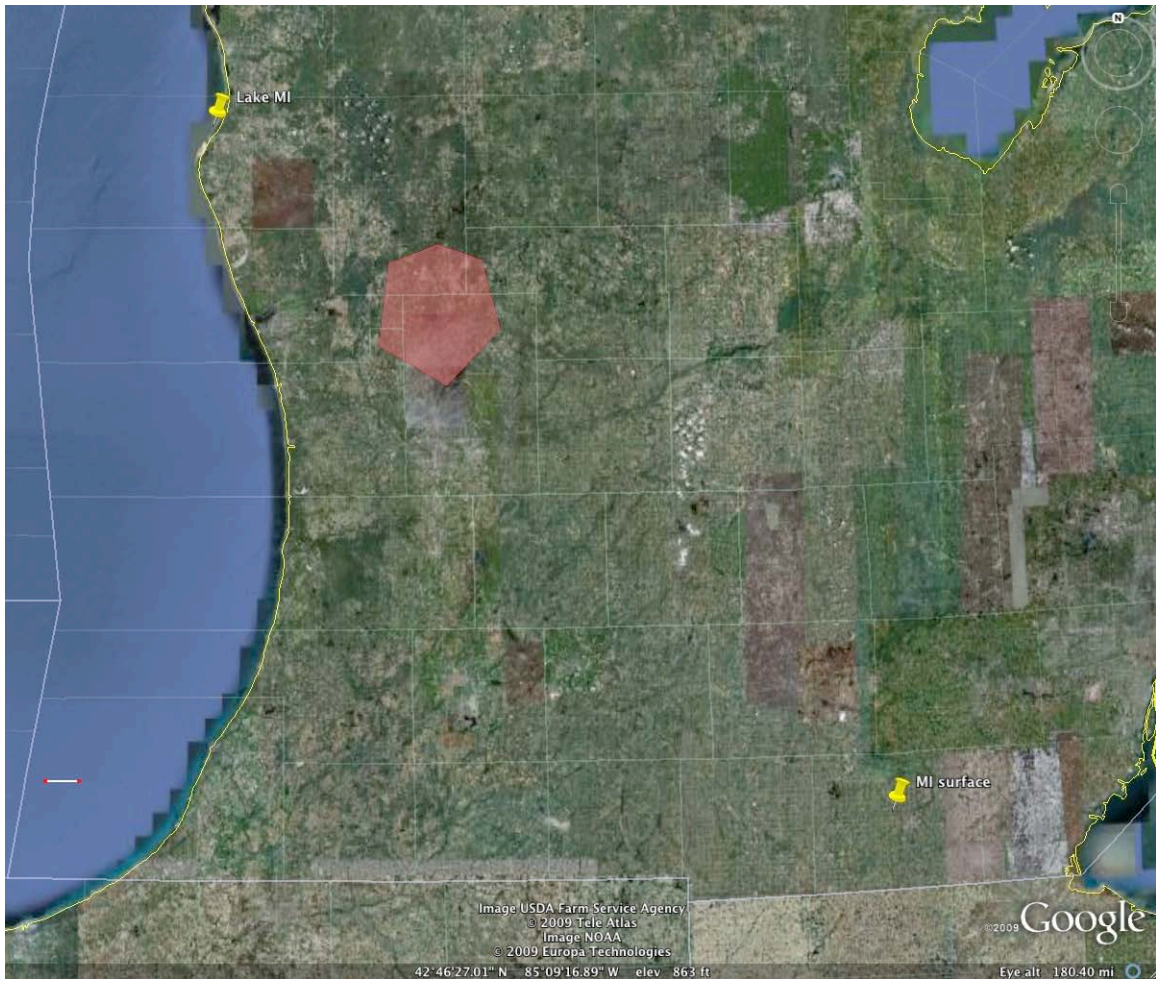

**Figure S3. Map showing MI water collection points<sup>1</sup>. Area where a CWD-positive deer has been found is shown in red. Scale bar, 10 km.**

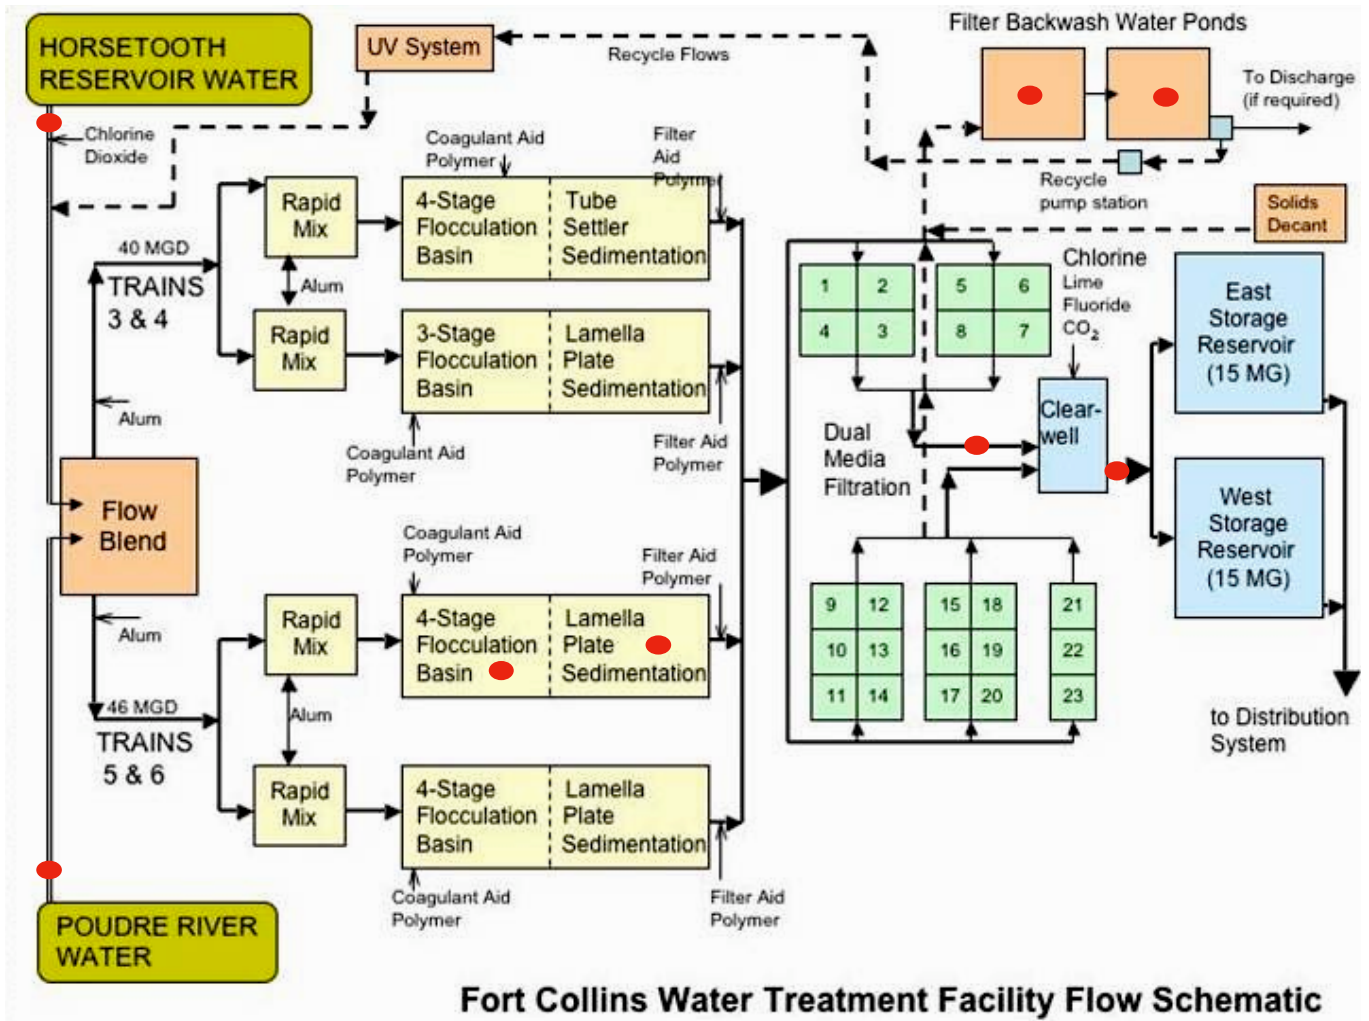

Figure S4. Schematic of the FCWTF showing water collection points. Red dots indicate water sampling stations.

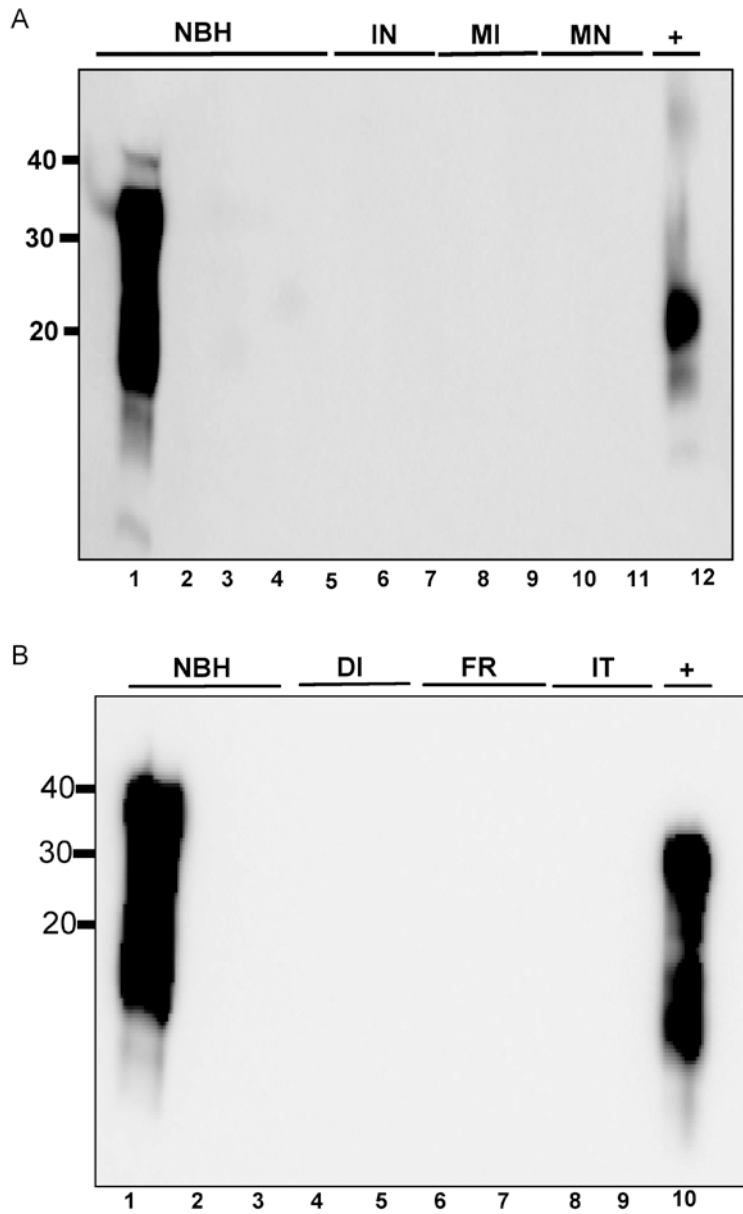

**Figure S5: Bottled water and municipal water negative controls** All samples were digested with Proteinase K except normal brain homogenate (NBH) in lane 1. (A) NBH negative controls and 9) and Minnesota (MN, lanes 10 and 11) were negative for PrP<sup>CWD</sup> after 6 rounds of sPMCA. Lane 12 shows a 1:100,000 positive amplification control (+). (B) NBH negative controls (lanes 2 and 3), deionized water (DI, lanes 4 and 5) and bottled water samples from France (FR, lanes 6 and 7) and Italy (IT, lanes 8 and 9) were negative for PrP<sup>CWD</sup> after 6 rounds of sPMCA. Lane 10 shows a 1:100,000 positive amplification

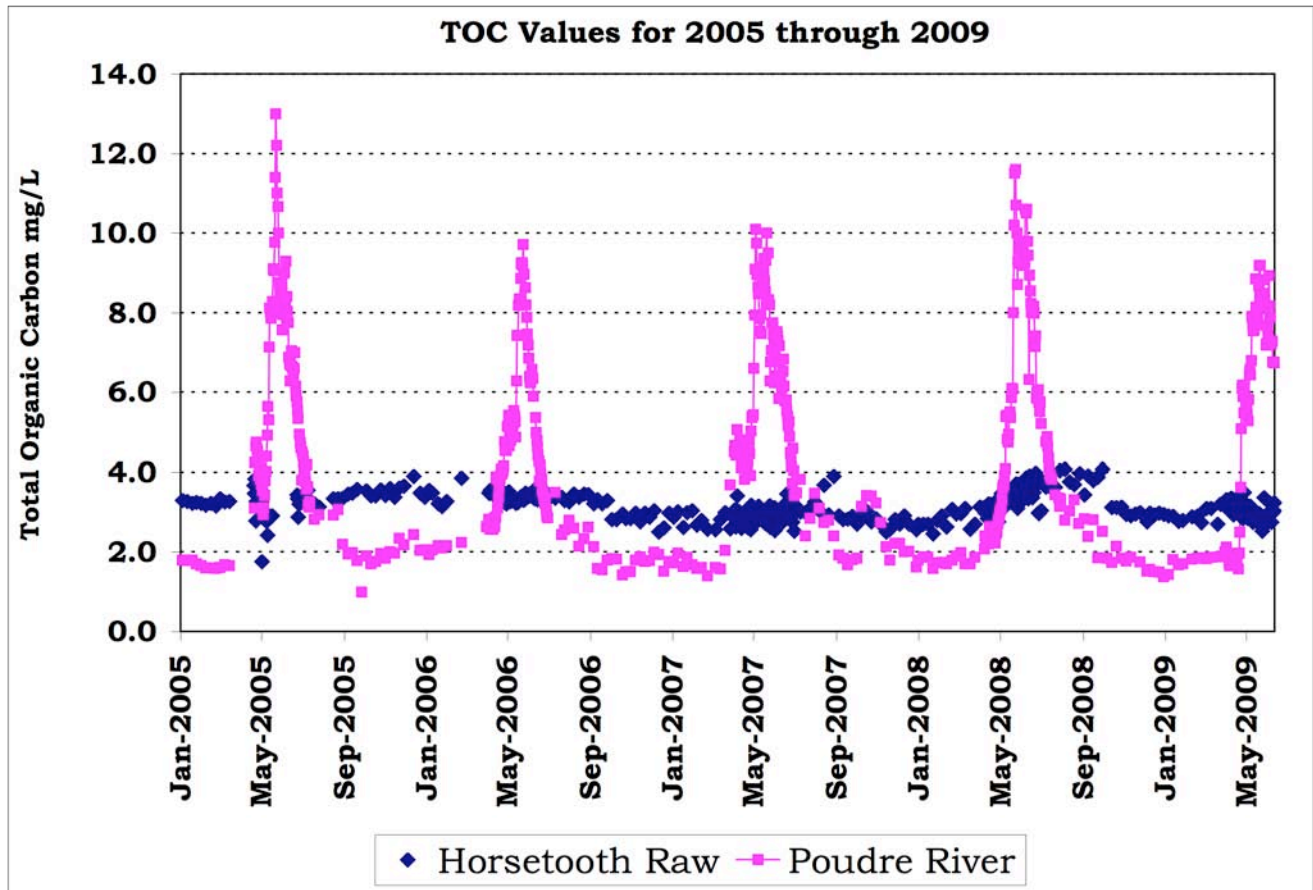

Figure S6. TOC values for HT and PR from January 2005 to present.

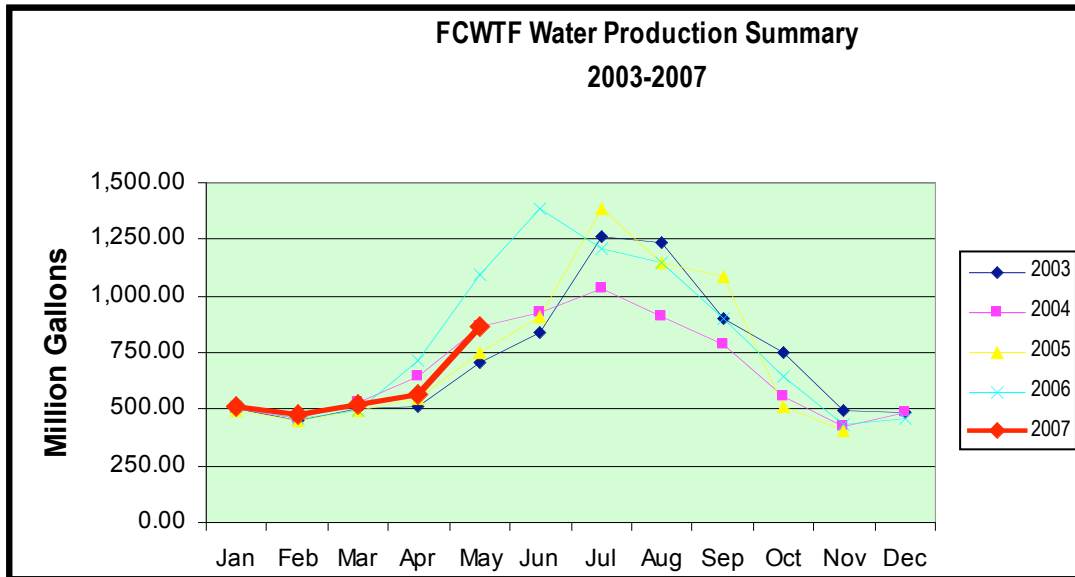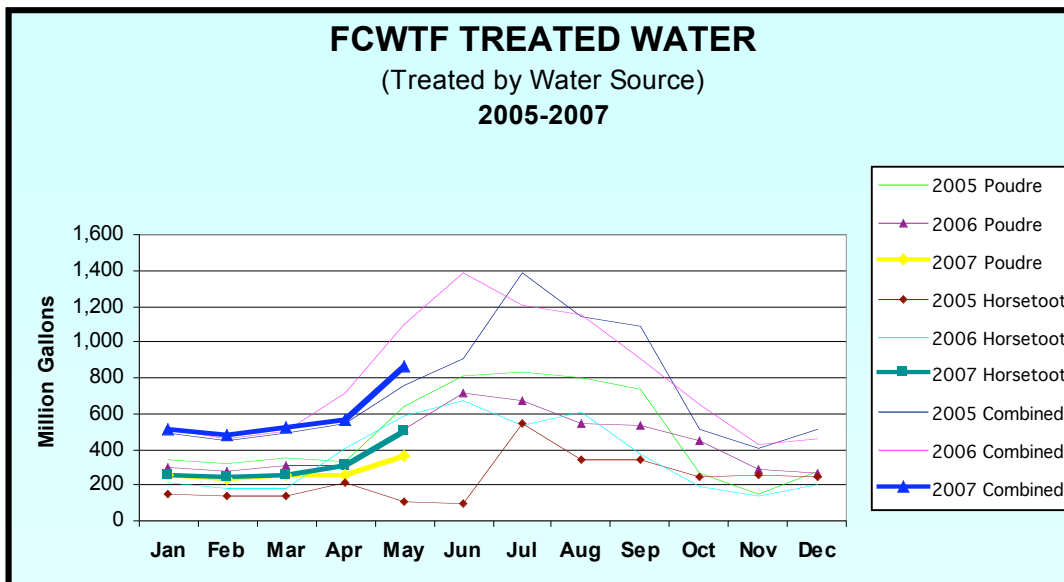

**Figure S7. FCWTF water production summaries.** (A) Production summary 2003-7. (B) Treated water production summary by raw water source, 2005-7.



A

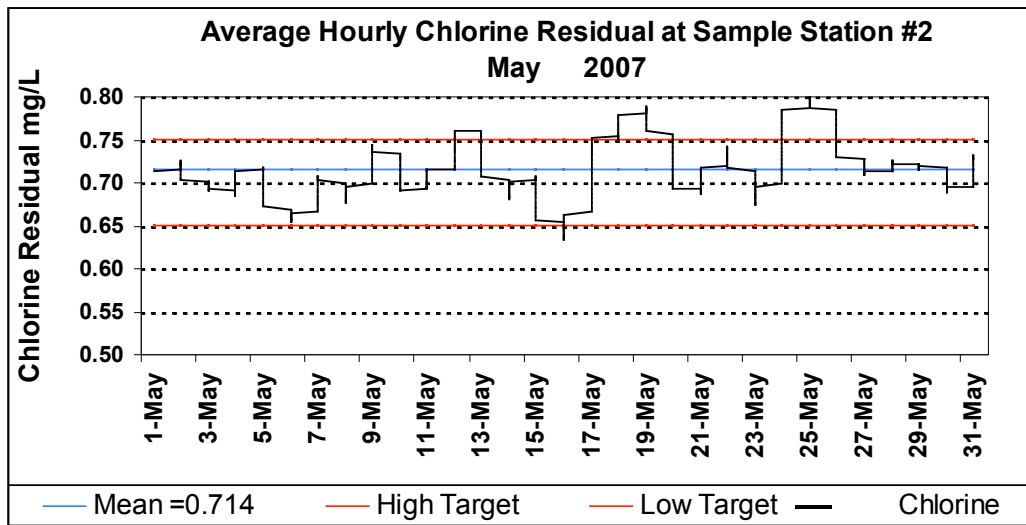

B

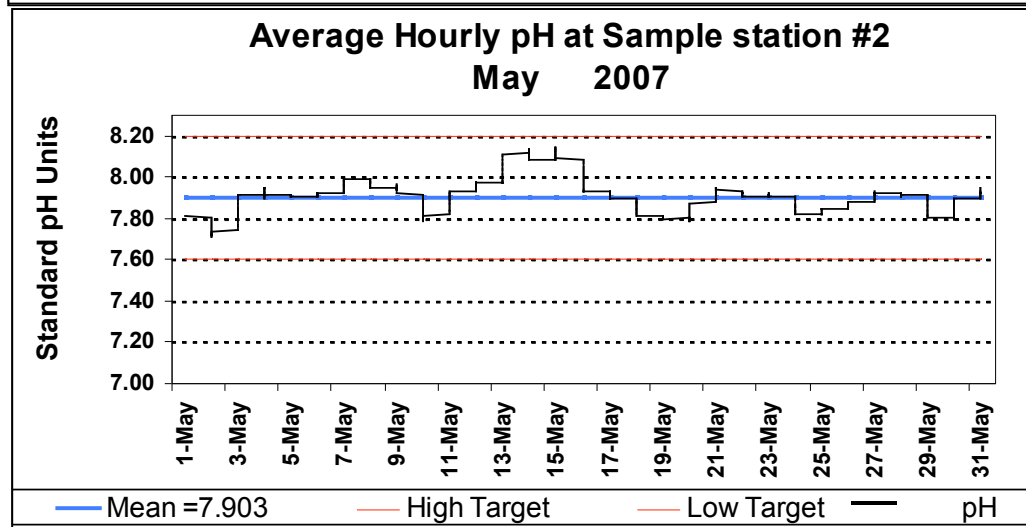

C

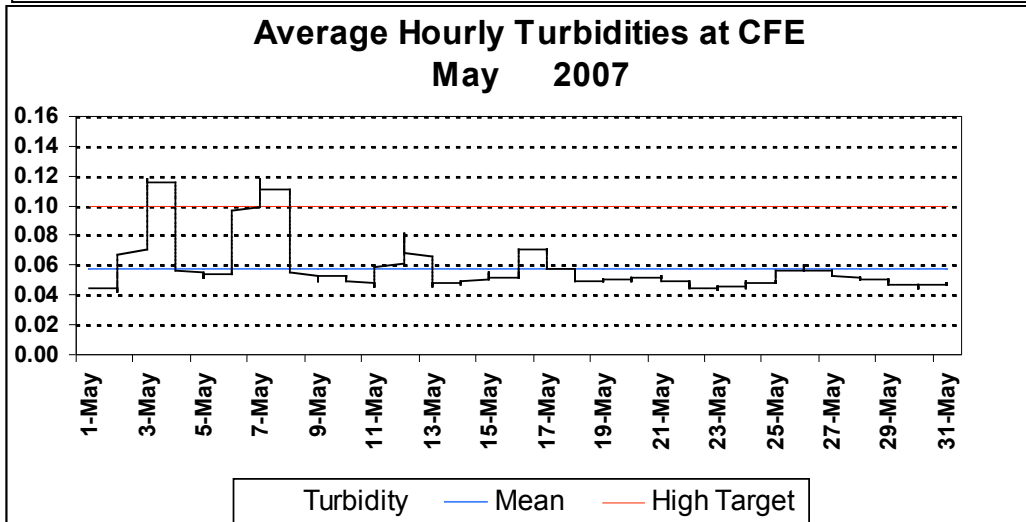

Figure S8. May 2007 averages for Chlorine residuals, pH and turbidity for finished water.

## References

- <sup>1</sup> Google Earth (2009).
- <sup>2</sup> *APHA, AWWA, and WEF. Standard Methods for the Examination of Water and Wastewater*, 20th ed. (Washington, 1998).
